# Supplementary material for: Personalized expression of bitter ‘taste’ receptors in human skin
Source: PubMed Central journal article supplement (PMC6192714; doi:10.1371/journal.pone.0205322), 2018-10-17
Supplement: pone.0205322.s029.pdf [file pone.0205322.s029.pdf]

**S1 Table.** Sun-exposed vs. not sun-exposed

| <i>Gene</i> | <i>M<sub>Sun-exposed</sub></i> | <i>M<sub>Not sun-exposed</sub></i> | <i>Kruskal-Wallis chi-squared</i> | <i>DF</i> | <i>P</i>  | <i>Summary</i> |
|-------------|--------------------------------|------------------------------------|-----------------------------------|-----------|-----------|----------------|
| TAS2R1      | 0                              | 0                                  | 0.778                             | 1         | 0.3777    | n.s.           |
| TAS2R3      | 0.110                          | 0.120                              | 0.232                             | 1         | 0.6302    | n.s.           |
| TAS2R4      | 0.554                          | 0.596                              | 1.604                             | 1         | 0.2053    | n.s.           |
| TAS2R5      | 1.774                          | 1.885                              | 1.345                             | 1         | 0.2462    | n.s.           |
| TAS2R7      | 0                              | 0                                  | 3.795                             | 1         | 0.0514    | n.s.           |
| TAS2R8      | 0                              | 0                                  | 0.169                             | 1         | 0.6808    | n.s.           |
| TAS2R9      | 0                              | 0                                  | 2.885                             | 1         | 0.0894    | n.s.           |
| TAS2R10     | 0.109                          | 0.083                              | 3.492                             | 1         | 0.06167   | n.s.           |
| TAS2R13     | 0.023                          | 0.022                              | 0.103                             | 1         | 0.7488    | n.s.           |
| TAS2R14     | 0.701                          | 0.785                              | 5.401                             | 1         | 0.02012   | *              |
| TAS2R16     | 0                              | 0                                  | 0.142                             | 1         | 0.7059    | n.s.           |
| TAS2R19     | 0.184                          | 0.186                              | 0.055                             | 1         | 0.8138    | n.s.           |
| TAS2R20     | 0.774                          | 0.750                              | 0.466                             | 1         | 0.495     | n.s.           |
| TAS2R30     | 0.025                          | 0.034                              | 9.381                             | 1         | 0.002192  | **             |
| TAS2R31     | 0.210                          | 0.186                              | 1.017                             | 1         | 0.3132    | n.s.           |
| TAS2R38     | 0                              | 0                                  | 3.166                             | 1         | 0.07521   | n.s.           |
| TAS2R39     | 0                              | 0                                  | 0.022                             | 1         | 0.8829    | n.s.           |
| TAS2R40     | 0                              | 0                                  | 0.453                             | 1         | 0.501     | n.s.           |
| TAS2R41     | 0                              | 0                                  | 3.662                             | 1         | 0.05565   | n.s.           |
| TAS2R42     | 0                              | 0                                  | 4.624                             | 1         | 0.03153   | *              |
| TAS2R43     | 0.032                          | 0.036                              | 0.828                             | 1         | 0.3628    | n.s.           |
| TAS2R46     | 0.037                          | 0.039                              | 0.404                             | 1         | 0.5248    | n.s.           |
| TAS2R50     | 0.031                          | 0.036                              | 3.452                             | 1         | 0.06316   | n.s.           |
| TAS2R60     | 0.046                          | 0                                  | 66.581                            | 1         | 3.359e-16 | ****           |
