# Supplementary material for: Personalized expression of bitter ‘taste’ receptors in human skin
Source: PubMed Central journal article supplement (PMC6192714; doi:10.1371/journal.pone.0205322), 2018-10-17
Supplement: pone.0205322.s030.pdf [file pone.0205322.s030.pdf]

**S2 Table.** Male vs. female in not sun-exposed tissue

| <i>Gene</i> | <i>M<sub>Female</sub></i> | <i>M<sub>Male</sub></i> | <i>Kruskal-Wallis chi-squared</i> | <i>DF</i> | <i>P</i> | <i>Summary</i> |
|-------------|---------------------------|-------------------------|-----------------------------------|-----------|----------|----------------|
| TAS2R1      | 0                         | 0                       | 1.593                             | 1         | 0.215    | n.s.           |
| TAS2R3      | 0.144                     | 0.110                   | 6.947                             | 1         | 0.008    | **             |
| TAS2R4      | 0.677                     | 0.551                   | 10.381                            | 1         | 0.001    | **             |
| TAS2R5      | 1.928                     | 1.831                   | 1.960                             | 1         | 0.162    | n.s.           |
| TAS2R7      | 0                         | 0                       | 0.444                             | 1         | 0.505    | n.s.           |
| TAS2R8      | 0                         | 0                       | 5.467                             | 1         | 0.019    | *              |
| TAS2R9      | 0                         | 0                       | 0.079                             | 1         | 0.779    | n.s.           |
| TAS2R10     | 0.081                     | 0.084                   | 0.019                             | 1         | 0.891    | n.s.           |
| TAS2R13     | 0.023                     | 0.022                   | 0.628                             | 1         | 0.428    | n.s.           |
| TAS2R14     | 0.747                     | 0.793                   | 0.792                             | 1         | 0.374    | n.s.           |
| TAS2R16     | 0                         | 0                       | 0.839                             | 1         | 0.360    | n.s.           |
| TAS2R19     | 0.179                     | 0.186                   | 0.470                             | 1         | 0.493    | n.s.           |
| TAS2R20     | 0.741                     | 0.742                   | 0.007                             | 1         | 0.931    | n.s.           |
| TAS2R30     | 0.031                     | 0.039                   | 2.391                             | 1         | 0.122    | n.s.           |
| TAS2R31     | 0.180                     | 0.191                   | 2.307                             | 1         | 0.129    | n.s.           |
| TAS2R38     | 0                         | 0                       | 0.008                             | 1         | 0.929    | n.s.           |
| TAS2R39     | 0                         | 0                       | 0.904                             | 1         | 0.342    | n.s.           |
| TAS2R40     | 0                         | 0                       | 0.002                             | 1         | 0.966    | n.s.           |
| TAS2R41     | 0                         | 0                       | 0.056                             | 1         | 0.823    | n.s.           |
| TAS2R42     | 0                         | 0                       | 0.029                             | 1         | 0.865    | n.s.           |
| TAS2R43     | 0.038                     | 0.035                   | 0.965                             | 1         | 0.326    | n.s.           |
| TAS2R46     | 0.044                     | 0.040                   | 0.019                             | 1         | 0.890    | n.s.           |
| TAS2R50     | 0.033                     | 0.037                   | 0.911                             | 1         | 0.340    | n.s.           |
| TAS2R60     | 0                         | 0.014                   | 0.007                             | 1         | 0.932    | n.s.           |
