# Supplementary material for: Personalized expression of bitter ‘taste’ receptors in human skin
Source: PubMed Central journal article supplement (PMC6192714; doi:10.1371/journal.pone.0205322), 2018-10-17
Supplement: pone.0205322.s031.pdf [file pone.0205322.s031.pdf]

**S3 Table.** Male vs. female in sun-exposed tissue

| <i>Gene</i> | <i>M<sub>Female</sub></i> | <i>M<sub>Male</sub></i> | <i>Kruskal-Wallis chi-squared</i> | <i>DF</i> | <i>P</i> | <i>Summary</i> |
|-------------|---------------------------|-------------------------|-----------------------------------|-----------|----------|----------------|
| TAS2R1      | 0                         | 0                       | 0.130                             | 1         | 0.718    | n.s.           |
| TAS2R3      | 0.088                     | 0.111                   | 4.172                             | 1         | 0.041    | *              |
| TAS2R4      | 0.511                     | 0.590                   | 2.885                             | 1         | 0.089    | n.s.           |
| TAS2R5      | 1.765                     | 1.815                   | 0.605                             | 1         | 0.437    | n.s.           |
| TAS2R7      | 0                         | 0                       | 1.650                             | 1         | 0.199    | n.s.           |
| TAS2R8      | 0                         | 0                       | 0.000                             | 1         | 0.997    | n.s.           |
| TAS2R9      | 0                         | 0                       | 7.081                             | 1         | 0.008    | **             |
| TAS2R10     | 0.092                     | 0.107                   | 3.482                             | 1         | 0.062    | n.s.           |
| TAS2R13     | 0.020                     | 0.024                   | 3.182                             | 1         | 0.074    | n.s.           |
| TAS2R14     | 0.635                     | 0.715                   | 7.131                             | 1         | 0.008    | **             |
| TAS2R16     | 0                         | 0                       | 0.190                             | 1         | 0.663    | n.s.           |
| TAS2R19     | 0.197                     | 0.187                   | 0.025                             | 1         | 0.875    | n.s.           |
| TAS2R20     | 0.714                     | 0.772                   | 2.569                             | 1         | 0.109    | n.s.           |
| TAS2R30     | 0.030                     | 0.027                   | 0.022                             | 1         | 0.881    | n.s.           |
| TAS2R31     | 0.201                     | 0.206                   | 0.438                             | 1         | 0.508    | n.s.           |
| TAS2R38     | 0                         | 0                       | 0.106                             | 1         | 0.733    | n.s.           |
| TAS2R39     | 0                         | 0                       | 0.003                             | 1         | 0.959    | n.s.           |
| TAS2R40     | 0                         | 0                       | 0.077                             | 1         | 0.782    | n.s.           |
| TAS2R41     | 0                         | 0                       | 0.211                             | 1         | 0.646    | n.s.           |
| TAS2R42     | 0                         | 0                       | 2.030                             | 1         | 0.154    | n.s.           |
| TAS2R43     | 0.028                     | 0.035                   | 1.215                             | 1         | 0.270    | n.s.           |
| TAS2R46     | 0.037                     | 0.037                   | 0.607                             | 1         | 0.436    | n.s.           |
| TAS2R50     | 0.027                     | 0.034                   | 2.256                             | 1         | 0.133    | n.s.           |
| TAS2R60     | 0.060                     | 0.041                   | 7.629                             | 1         | 0.006    | **             |
